## CORRECTION

# Correction: Impact of COVID-19 on gynecologic and obstetrical services at two large health systems

The *PLOS ONE* Staff

## Notice of Republication

This article was republished on April 12, 2023, to correct for errors in the Data Availability statement. The publisher apologizes for the errors. Please download this article again to view the correct version. The originally published, uncorrected article and the republished, corrected article are provided here for reference.

## Supporting information

**S1 File. Originally published, uncorrected article.**

(PDF)

**S2 File. Republished, corrected article.**

(PDF)

## Reference

1. Liang AL, Turner LC, Voegtline KM, Olson SB, Wildey B, Handa VL (2022) Impact of COVID-19 on gynecologic and obstetrical services at two large health systems. *PLoS ONE* 17(6): e0269852. <https://doi.org/10.1371/journal.pone.0269852> PMID: 35709084

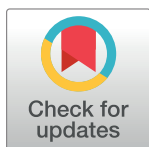

## OPEN ACCESS

**Citation:** The *PLOS ONE* Staff (2025) Correction: Impact of COVID-19 on gynecologic and obstetrical services at two large health systems. *PLoS ONE* 20(2): e0318957. <https://doi.org/10.1371/journal.pone.0318957>

**Published:** February 3, 2025

**Copyright:** © 2025 The PLOS ONE Staff. This is an open access article distributed under the terms of the [Creative Commons Attribution License](https://creativecommons.org/licenses/by/4.0/), which permits unrestricted use, distribution, and reproduction in any medium, provided the original author and source are credited.
